# Supplementary material
Source: PubMed Central journal article supplement (PMC7175074)
Supplement: jbt.20-3101-004.sd1.pdf [file jbt.20-3101-004.sd1.pdf]

Supplementary table S1: Sanger Sequencing results of salivary DNA: confirmation of genotype of SNP CC16 38A/G and SNP UGRP1 112A/G

| sample | CC16 38A/G |                                                     | 112 38A/G    |                                                     |
|--------|------------|-----------------------------------------------------|--------------|-----------------------------------------------------|
|        | genotype   | raw sequencing data of reverse complementary strand | genotype     | raw sequencing data of reverse complementary strand |
| A      | CC16 38G/G |                                                     | UGRP1 112G/G |                                                     |
| B      | CC16 38G/G |                                                     | UGRP1 112G/G |                                                     |
| C      | CC16 38A/G |                                                     | UGRP1 112G/G |                                                     |
| D      | CC16 G/G   |                                                     | UGRP1 112A/G |                                                     |
| E      | CC16 38A/G |                                                     | UGRP1 112A/G |                                                     |
| F      | CC16 38A/G |                                                     | UGRP1 112G/G |                                                     |
| G      | CC16 38A/G |                                                     | UGRP1 112G/G |                                                     |
| H      | CC16 38A/G |                                                     | UGRP1 112G/G |                                                     |
| I      | CC16 38A/G |                                                     | UGRP1 112G/G |                                                     |
| J      | CC16 38A/G |                                                     | UGRP1 112G/G |                                                     |
| K      | CC16 38G/G |                                                     | UGRP1 112G/G |                                                     |
| L      | CC16 38A/G |                                                     | UGRP1 112A/G |                                                     |
| M      | CC16 38A/G |                                                     | UGRP1 112G/G |                                                     |

|   |            |  |              |  |
|---|------------|--|--------------|--|
| N | CC16 38G/G |  | UGRP1 112G/G |  |
| O | CC16 38G/G |  | UGRP1 112G/G |  |
| P | CC16A/G    |  | UGRP1 112A/G |  |
| Q | CC16 38A/G |  | UGRP1 112G/G |  |
| R | CC16 38G/G |  | UGRP1 112G/G |  |
| S | CC16 38G/G |  | UGRP1 112A/G |  |
| T | CC16 38G/G |  | UGRP1 112A/G |  |
